# Supplementary material for: A high-performance C@Na5V12O32 nanowire electrode derived from the reconstruction of carbon quantum dots
Source: Royal Society of Chemistry journal article supplement (doi:10.1039/d4dt01162g), 2024-01-01
Supplement: d4dt01162g1.pdf [file d4dt01162g1.pdf]

## Supporting information

### A high-performance C@Na<sub>5</sub>V<sub>12</sub>O<sub>32</sub> nanowire electrode derived from reconstruct of carbon quantum dots

Zhengying Zhang<sup>a</sup>, Dong Fanga\*, Jianhong Yi<sup>a</sup>, Hua Yang<sup>a</sup>, Jian Liu<sup>b</sup>, Feng Liu<sup>b</sup>, Anvar Khamidov<sup>c</sup>, Olim Ruzimuradov<sup>c,d</sup>

a. Faculty of Materials Science and Engineering, Kunming University of Science and Technology, Kunming, 650093, China. Email: fangdong@kmust.edu.cn.

b. Yunnan Precious Metals Lab Co., Ltd., Kunming, Yunnan 650106, China.

c. Department of Chemistry, National University of Uzbekistan, 100174 Tashkent, Uzbekistan.

d. Turin Polytechnic University in Tashkent, 100095 Tashkent, Uzbekistan.

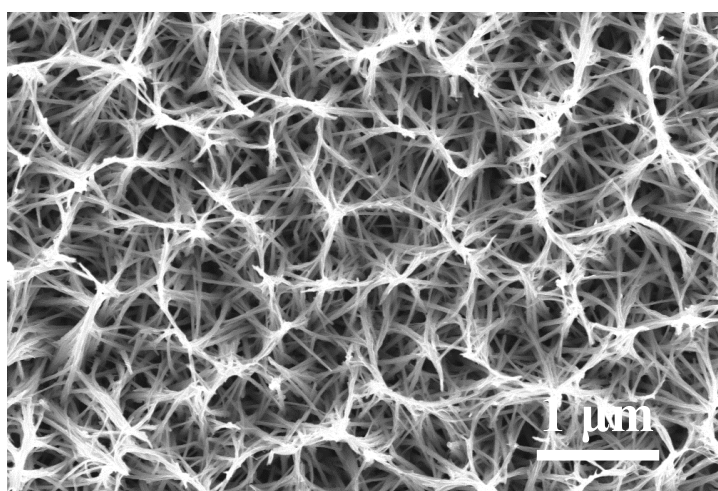

Figure S1. The SEM image of the Na<sub>5</sub>V<sub>12</sub>O<sub>32</sub>.

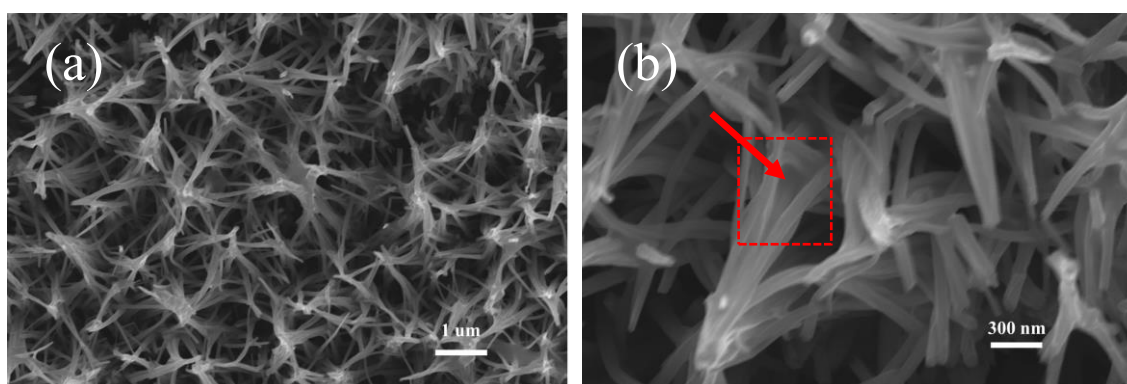

Figure S2. The SEM image of the CDs/NVO

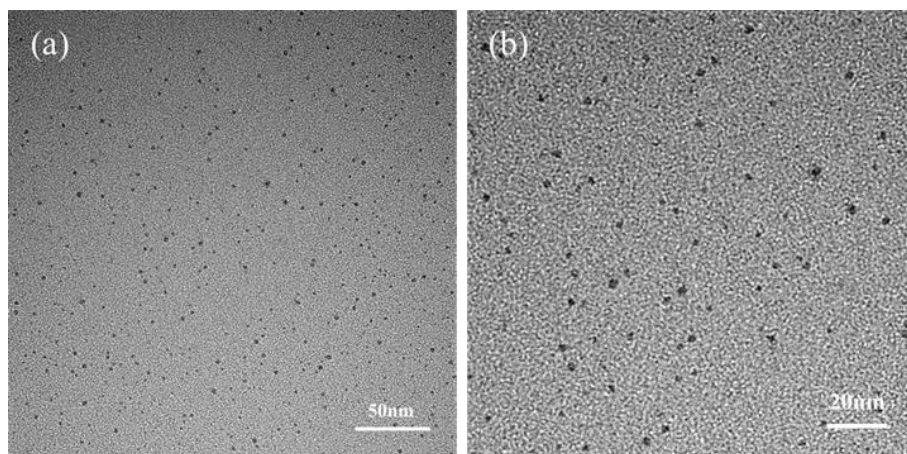

Figure S3. TEM images of carbon dots.

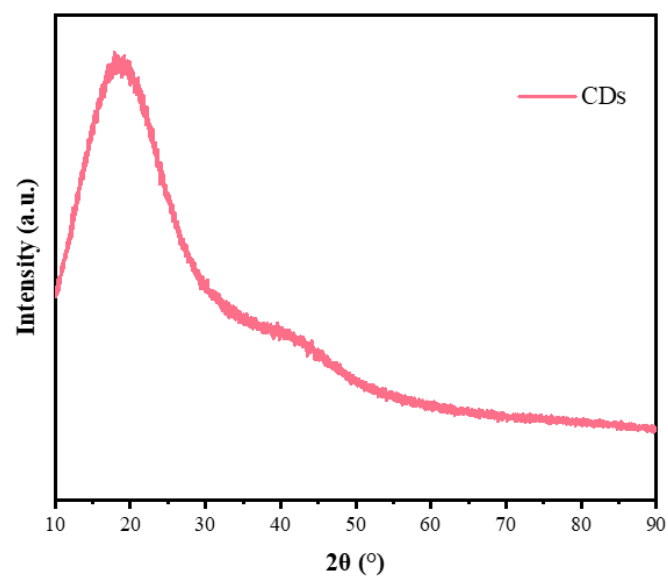

Figure S4. XRD patterns of carbon quantum dots.

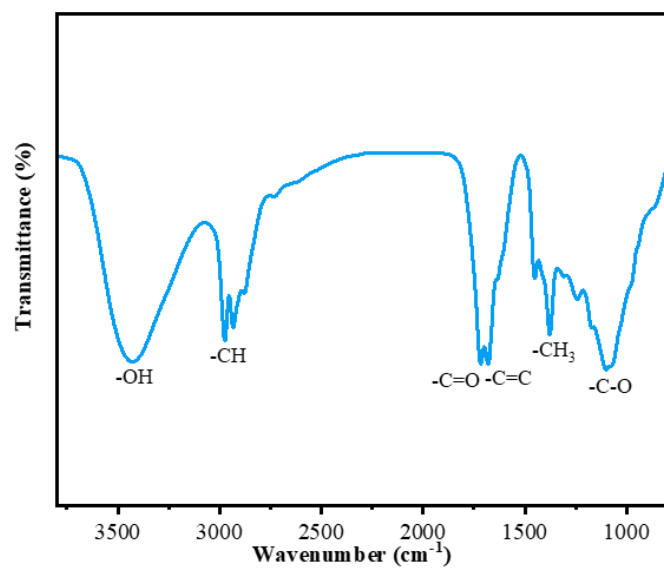

Figure S5. FT-IR spectra of carbon quantum dots.

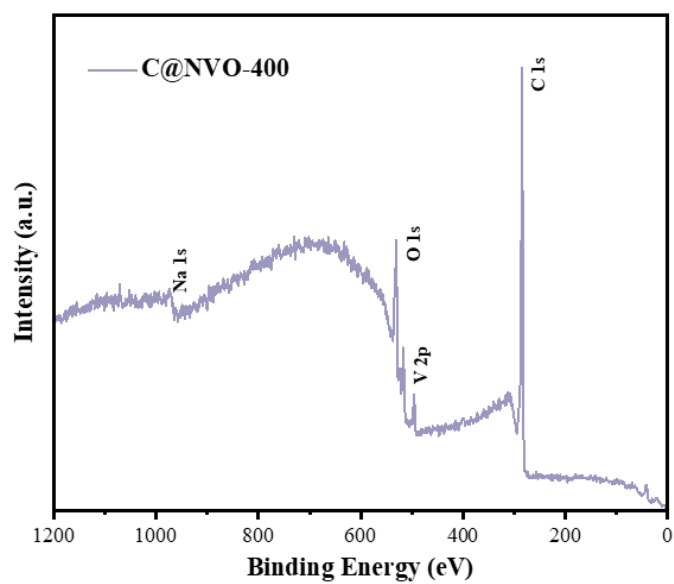

Figure S6. The survey spectra of C@NVO -400 samples.

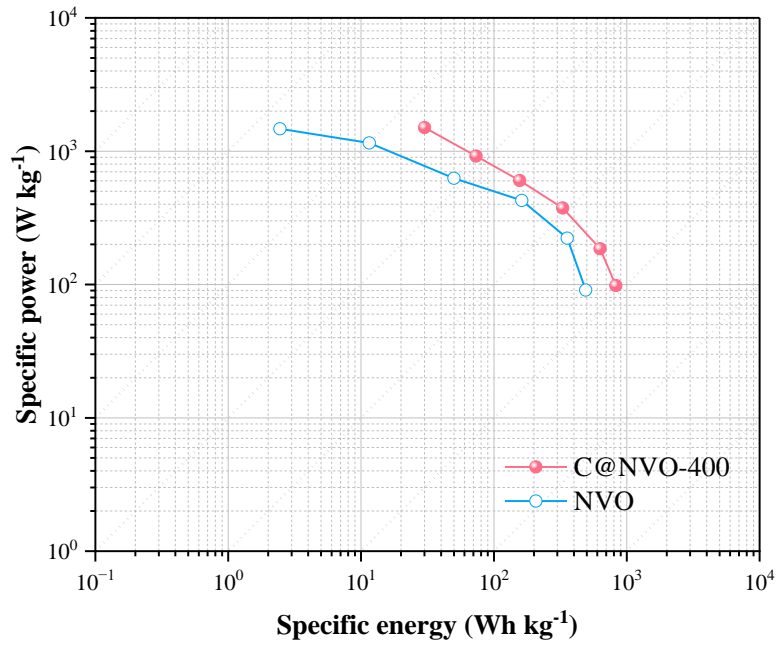

Figure S7. Ragone plots of NVO and C@NVO electrodes.

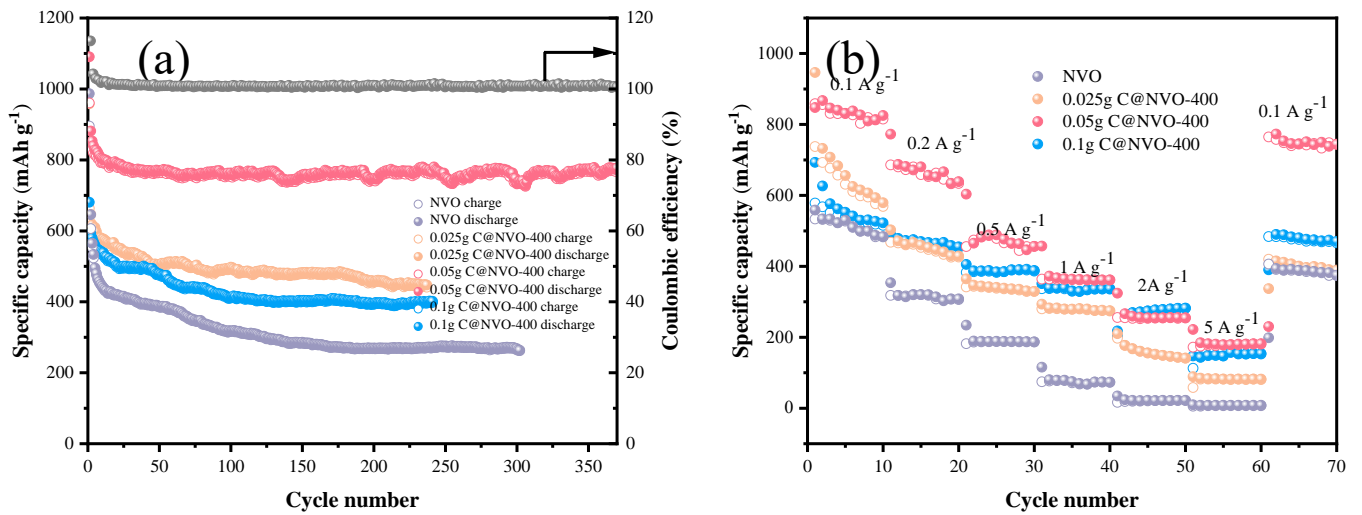

Figure S8. (a) Cycling performance and (b) rate capability of NVO, 0.025gC@NVO, 0.05gC@NVO and 0.1gC@NVO electrodes.

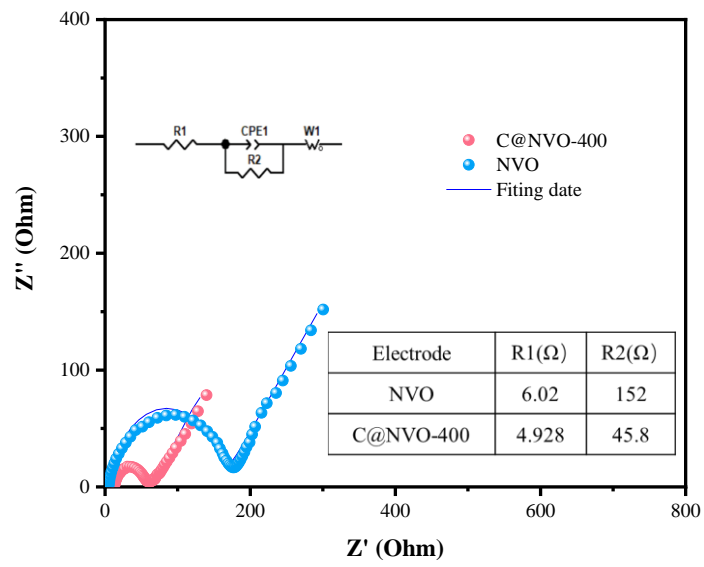

Figure S9. EIS spectra and the fitting curves of C@NVO-400 and NVO electrodes at an open voltage.
